# Supplementary material for: Evolution in situ: hybrid origin and establishment of willows (Salix L.) on alpine glacier forefields
Source: PubMed Central journal article supplement — Heredity (Edinb). 2016 Mar 16;116(6):531–41. doi: 10.1038/hdy.2016.14 (PMC4868266; doi:10.1038/hdy.2016.14), 2016-03-16

## SUPPLEMENTARY INFORMATION

**Table S1** Morphological diagnostic field characters of *S. helvetica*, *S. purpurea* and the hybrid (see also Hörandl et al., 2012).

|                                | <i>S. helvetica</i>                                                            | <i>S. purpurea</i>                     | hybrid                                                                                 |
|--------------------------------|--------------------------------------------------------------------------------|----------------------------------------|----------------------------------------------------------------------------------------|
| <b>leaf shape</b>              | ovate to broad lanceolate, max. width in the center                            | small lanceolate to linear apikal part | Intermediate                                                                           |
| <b>leaf margin</b>             | revolute, entire or with small teeth along the leaf                            | smooth, serrate only in the upper part | Intermediate                                                                           |
| <b>lower surface of leaves</b> | densely tomentose (hairs covering surface, therefore it appears white or grey) | glabrous, pruinose                     | sparsely hairy (hairs not covering the surface, therefore it appears green); pubescent |
| <b>Buds</b>                    | globose to ellipsoid, hairy                                                    | elongated, flattened, glabrous         | Intermediate                                                                           |
| <b>capsules</b>                | Stipitate, elongate                                                            | Sessile, ellipsoid                     | intermediate                                                                           |
| <b>style</b>                   | long                                                                           | very short                             | intermediate                                                                           |

**Table S2** Quantitative characters measured on herbarium vouchers and used for calculating ratios.

| Morphometric characters | Description                                                         |
|-------------------------|---------------------------------------------------------------------|
| 1. FK_Länge             | Length of capsule (mm)                                              |
| 2. FK_Stiel             | Length of stipe of capsule (mm)                                     |
| 3. Griffellänge         | Length of style (mm)                                                |
| 4. K_Laenge             | Bud length (mm)                                                     |
| 5. K_Breite             | Bud width (tangential to the branch; mm)                            |
| 6. K_Dicke              | Bud thickness (in a right angle to the branch; mm)                  |
| 7. LB_Blattstiel        | Petiole length of adult leaves (mm)                                 |
| 8. LB_Laenge            | Length of adult leaves (mm)                                         |
| 9. LB_Breite            | Greatest width of adult leaves (mm)                                 |
| 10. LB_LaengeZuBreite   | Distance from adult leaf blade base to the greatest leaf width (mm) |
| 11. LB_Seitenerven      | Number of main lateral veins on adult leaf                          |
| 12. LB_oZaehnung        | Number of teeth on the leaf margin above the greatest width         |
| 13. LB_uZaehnung        | Number of teeth on the leaf margin below the greatest width         |
| 14. PB_Blattstiel       | Petiole length of primary leaves (mm)                               |
| 15. PB_Laenge           | Length of primary leaves                                            |
| 16. PB_Breite           | Greatest width of primary leaves                                    |
| 17. PB_LaengeZuBreite   | Distance from primary leaf blade base to the greatest leaf width    |

**Table S3** Overview of the applied microsatellite loci and detailed specification of the reaction conditions.

| Microsatellite locus | Primer sequences 5'-3' (forward, reverse)      | Repeat              | Observed product size (bp)         | Amplification conditions <sup>1</sup> (°C)              | Label | Multiplex |
|----------------------|------------------------------------------------|---------------------|------------------------------------|---------------------------------------------------------|-------|-----------|
| ORPM 301             | CAAAGATGGTGACTGGATGC<br>AGCCTATTGCTCCGATCCT    | [CT]5               | S. p. monomorphic<br>S. h. 175-207 | 60/55                                                   | NED   | 1         |
| ORPM 446             | GGGCTGCAGACAAATTAAGG<br>TGGGACATGCTCCATGGTAT   | [CT]3...[CT]4       | S. p. 227-241<br>S. h. 229-257     | 60/55 <sup>2</sup>                                      | VIC   | 1         |
| GCPM 1255            | GAACCTTAAAACCAGaaCCC<br>gagccacagaAatActgctc   | [AG]23              | S. p. 188-207<br>S. h. 190-206     | 60/55                                                   | PET   | 2         |
| GCPM 1413-2          | TGAAGGAGAAGAAAAGCAAG<br>CATAACTGCTCCACCTGAGT   | [GAC]8              | S. p. 162-166<br>S. h. 157-191     | 60/55                                                   | NED   | 3         |
| GCPM 1812            | TGCTTCTCTATTTCTAGGCG<br>GCTGTTACTGTCTCTCCAGC   | [GGT]7              | S. p. 192-213<br>S. h. 189-216     | 60/60 <sup>4</sup>                                      | VIC   | 3         |
| GCPM 2041-1          | AGACATTTCTGTTTAGCCGA<br>TctTCTTTGTGATGTctGGT   | [CTG]9              | S. p. 207-218<br>S. h. 204-224     | S. p. 60/55<br>S. h. and hybrid 55/55 <sup>3</sup>      | FAM   | 3         |
| SB 199               | CTATTTGGTCTCAATCACCTT<br>CTTTACCTCAGAAAATCCAGA | [TG]11CG[TG]6       | S. p. 106-112<br>S. h. 97-120      | S. p. 60/55<br>S. h. 60/60<br>Hybrid 60/55 <sup>4</sup> | FAM   | 1         |
| SB 233               | AAATTACCGTCCAATAAAGA<br>CATTAGCCATGAACAAGTAAA  | [TA]2[TGTGCG]4[TG]9 | S. p. 192-218<br>S. h. 188-238     | S. p. 65/65<br>S. h. 60/55 <sup>4</sup><br>Hybrid 60/50 | FAM   | 2         |
| gSIMCT024            | TCATTTGCTCGATGAGGTTG<br>GTGGTAGTTGCAAAAGGGGA   | [CT]10              | S. p. 287-303<br>S. h. 293-350     | S. p. 65/65<br>S. h. 60/55<br>Hybrid 60/60              | FAM   | 2         |

<sup>1</sup>The number before the slash denotes the initial annealing temperature in the first five cycles, the number after the slash denotes the annealing temperature in the touchdown-step. S. p. = *Salix purpurea*, S. h. = *S. helvetica*.

<sup>2</sup>Elongation set to 40 s.

<sup>3</sup>Elongation set to 45 s.

<sup>4</sup>Final step with 25 cycles.

**Table S4** Niche-differentiation of species along Ellenberg's gradients for 58 plots from Rhône Glacier with hybrids divided in F<sub>1</sub> hybrids and later generation hybrids (ShybF1=F<sub>1</sub>hybrid, ShybLG=later generation hybrid, Spur=*S. purpurea*, Shel=*S. helvetica*). Significant differences are in bold.

|   | ShybLG-ShybF1 | ShybLG-Spur | ShybLG-Shel | ShybF1-Spur | ShybF1-Shel | Spur-Shel   |
|---|---------------|-------------|-------------|-------------|-------------|-------------|
| T | 0.49          | <b>0.21</b> | 0.79        | <b>0.14</b> | 0.46        | <b>0.22</b> |
| R | 0.70          | <b>0.37</b> | 0.60        | <b>0.25</b> | 0.63        | <b>0.36</b> |
| F | 0.60          | 0.60        | 0.60        | 0.65        | 0.54        | 0.83        |
| N | 0.65          | <b>0.43</b> | <b>0.43</b> | <b>0.25</b> | 0.45        | <b>0.43</b> |

**Table S5** Niche-differentiation of species along Ellenberg's gradients for 58 sampling plots taken at the Rhône Glacier forefield plus 92 additional reference plots of parent individuals (46 containing *S. helvetica* and 46 containing *S. purpurea*) randomly selected from the Austrian Vegetation Database with hybrids divided in F<sub>1</sub> hybrids and later generation hybrids (ShybF1=F<sub>1</sub>hybrid, ShybLG=later generation hybrid, Spur=*S. purpurea*, Shel=*S. helvetica*). Significant differences are in bold.

|   | ShybLG-ShybF1 | ShybLG-Spur | ShybLG-Shel | ShybF1-Spur | ShybF1-Shel | Spur-Shel   |
|---|---------------|-------------|-------------|-------------|-------------|-------------|
| T | 0.86          | <b>0.20</b> | <b>0.46</b> | <b>0.17</b> | <b>0.49</b> | <b>0.17</b> |
| R | 0.89          | <b>0.30</b> | 0.70        | <b>0.26</b> | 0.63        | <b>0.29</b> |
| F | 0.92          | <b>0.34</b> | 0.57        | <b>0.31</b> | <b>0.53</b> | <b>0.46</b> |
| N | 0.79          | <b>0.20</b> | 0.67        | <b>0.09</b> | 0.58        | <b>0.16</b> |

**Table S6** Niche-differentiation of species along Ellenberg's gradients for 58 plots from Rhône Glacier (Shyb=hybrid, Spur=*S. purpurea*, Shel=*S. helvetica*). Significant differences are in bold.

|     | Shyb-Spur   | Shyb-Shel   | Spur-Shel   |
|-----|-------------|-------------|-------------|
| T   | <b>0.21</b> | 0.72        | <b>0.22</b> |
| R   | <b>0.34</b> | 0.64        | <b>0.35</b> |
| F   | 0.73        | 0.64        | 0.83        |
| N   | <b>0.40</b> | <b>0.45</b> | <b>0.43</b> |
| pH  | <b>0.40</b> | 0.66        | <b>0.43</b> |
| WRC | 0.74        | <b>0.58</b> | 0.60        |

**Table S7** Niche-differentiation of species along Ellenberg's gradients for 58 sampling plots taken at the Rhône Glacier forefield plus 92 additional reference plots of parent individuals (46 containing *S. helvetica* and 46 containing *S. purpurea*) randomly selected from the Austrian Vegetation Database (Shyb=hybrid, Spur=*S. purpurea*, Shel=*S. helvetica*). Significant differences are in bold.

|   | Shyb-Spur   | Shyb-Shel   | Spur-Shel   |
|---|-------------|-------------|-------------|
| T | <b>0.19</b> | <b>0.48</b> | <b>0.17</b> |
| R | <b>0.28</b> | 0.68        | <b>0.29</b> |
| F | <b>0.33</b> | 0.55        | <b>0.46</b> |
| N | <b>0.19</b> | 0.65        | <b>0.16</b> |

**Figure S1** Boxplots of ratios of morphometric characters of *S. helvetica*, *S. purpurea* and the hybrid (middle plots).

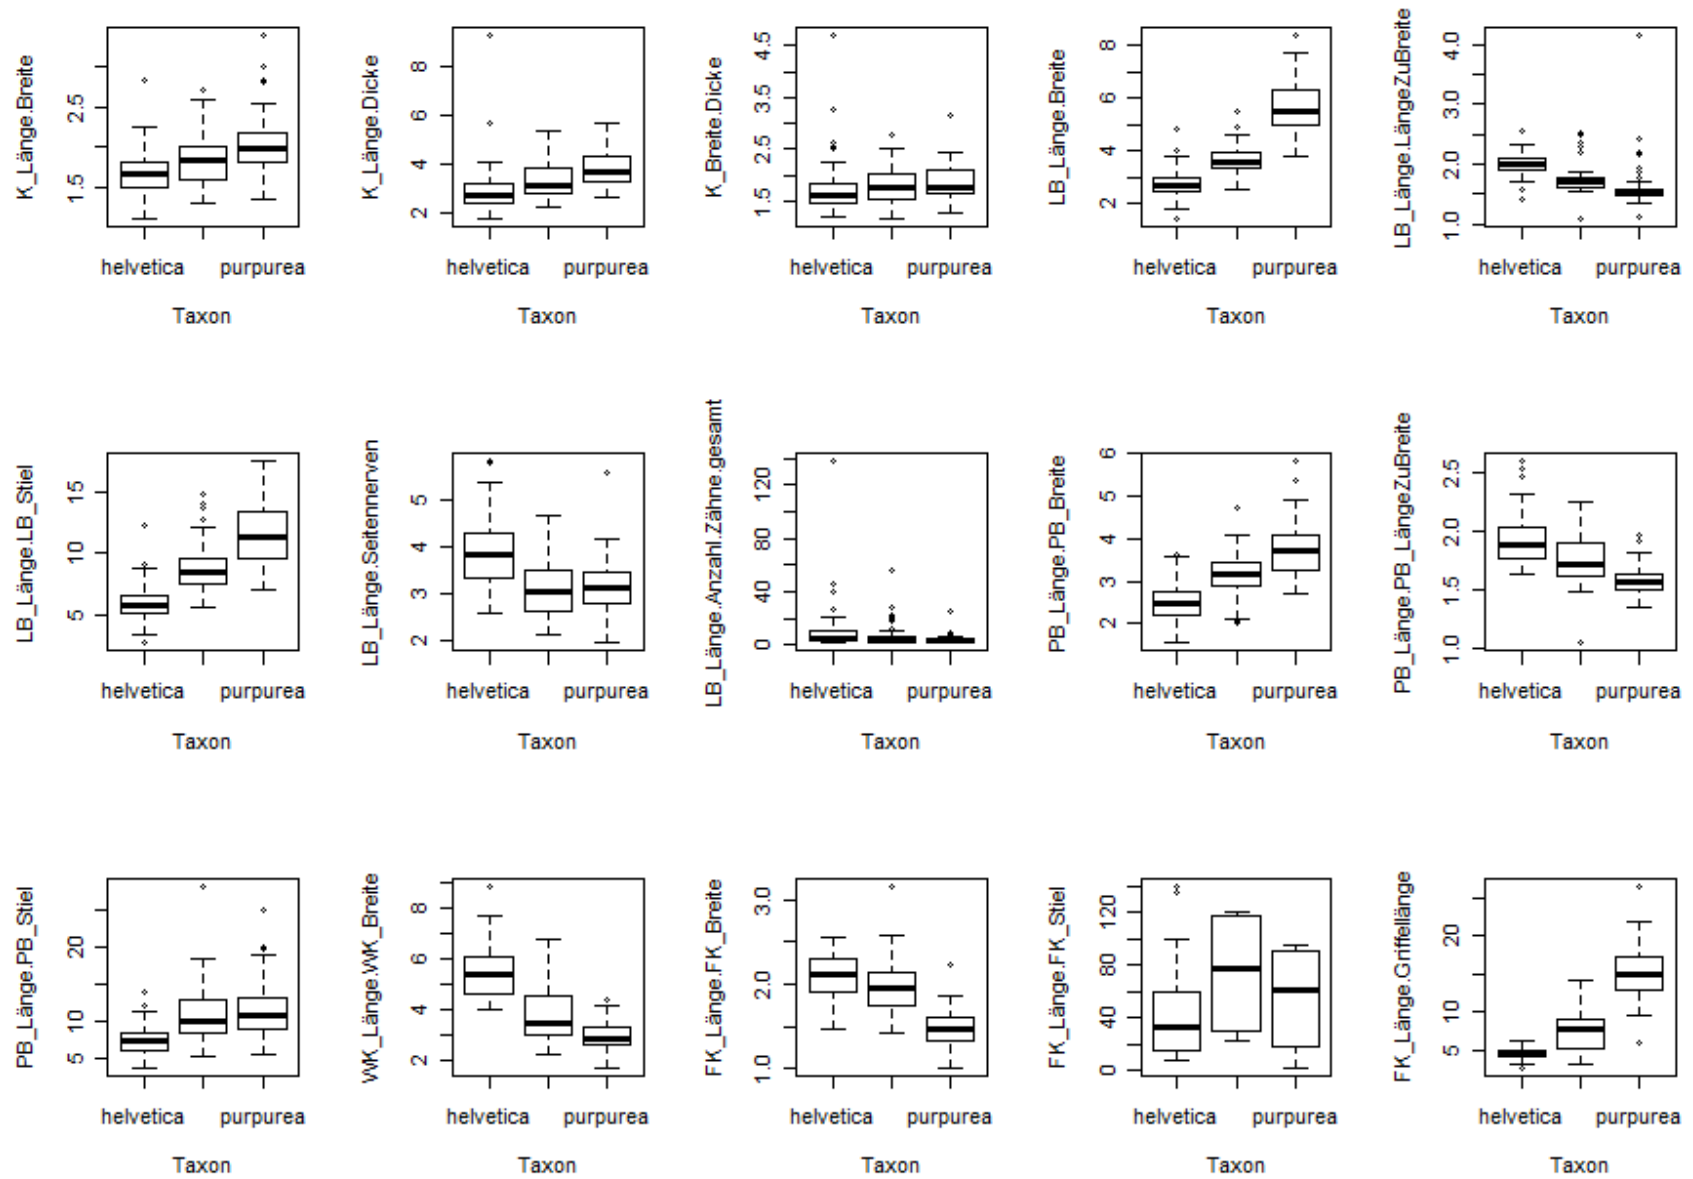

**Figure S2** Overview of the location of the 58 observation plots at the sampling site on the Rhône Glacier forefield. Pure stands of *S. purpurea* were sampled in the valley apart from the glacier forefield (left insert). The location of the Rhône Glacier in Switzerland is given in the right insert. (Image source: © 2011 Tele Atlas, accessed 12/2011).

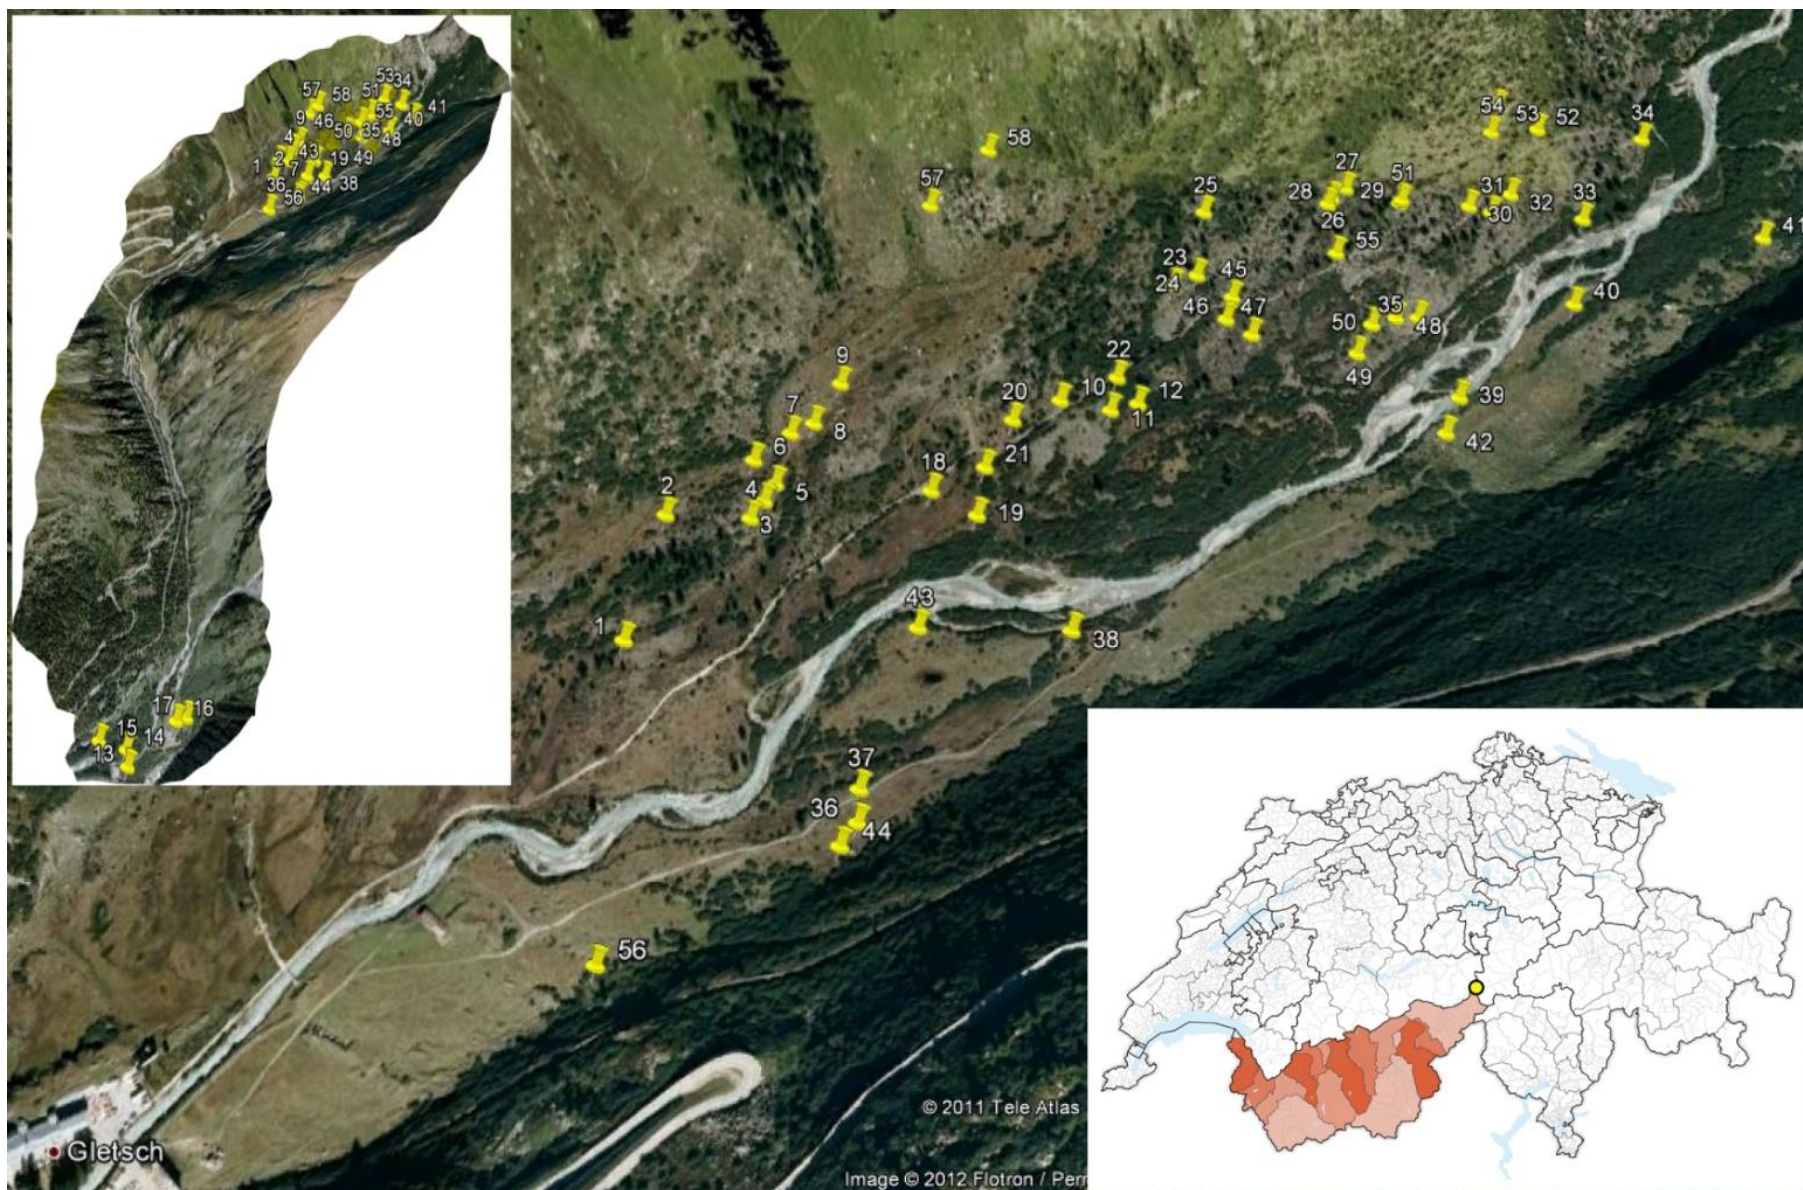

**Figure S3** Smoothed density of species abundances along six environmental gradients as calculated from data of 58 sampling plots at the Rhône Glacier forefield. Ellenberg's T, R, F and N values are indicator values of temperature, pH, soil moisture and nutrient availability as computed from the accompanying vegetation. The curves represent densities of *S. helvetica* (green), *S. purpurea* (red), F<sub>1</sub> hybrids (dark blue) and later generation hybrids (steel-blue). The dashed curve represents the density of the respective environmental variable.

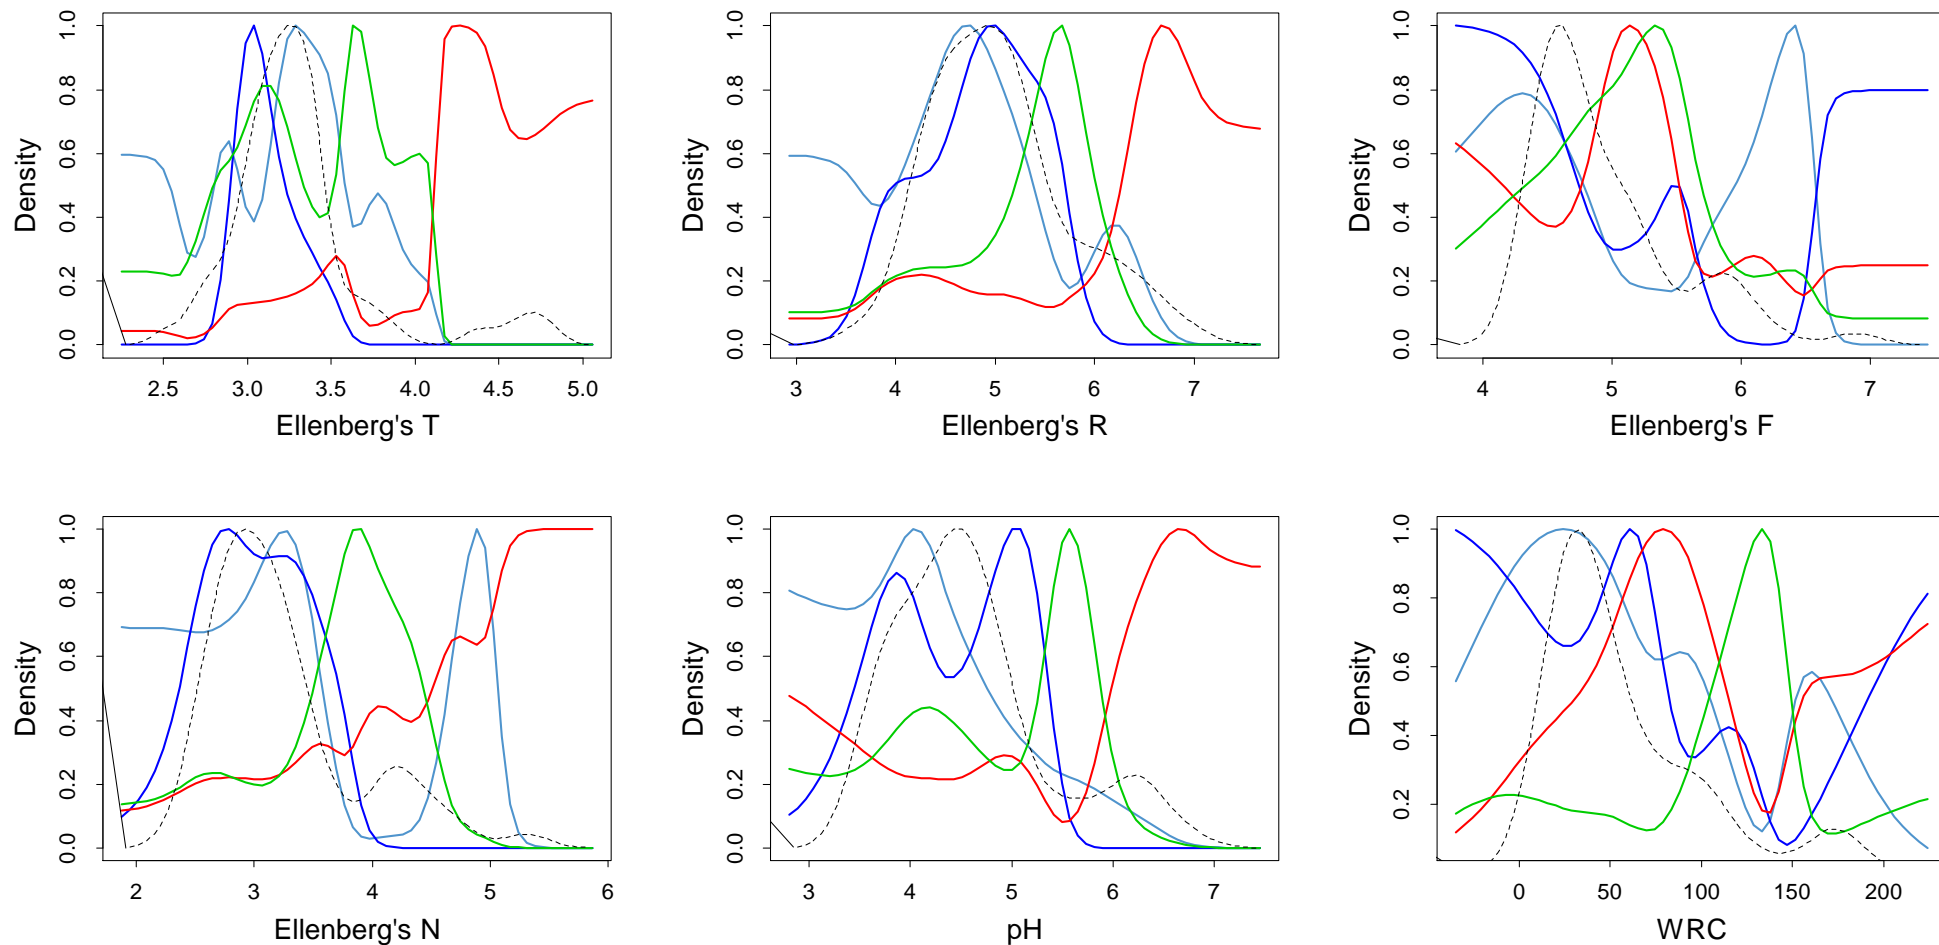



**Figure S4** Smoothed density of species abundances along four environmental gradients as calculated from 58 sampling plots taken at the Rhône Glacier forefield plus 92 additional samples (46 containing *S. helvetica* and 46 containing *S. purpurea*) randomly selected from the Austrian vegetation database. Ellenberg's T, R, F and N values are indicator values of temperature, pH, soil moisture and nutrient availability as computed from the accompanying vegetation. The curves represent densities of *S. helvetica* (green), *S. purpurea* (red), F<sub>1</sub> hybrids (dark blue) and later generation hybrids (steel-blue). The dashed curve represents the density of the respective environmental variable.

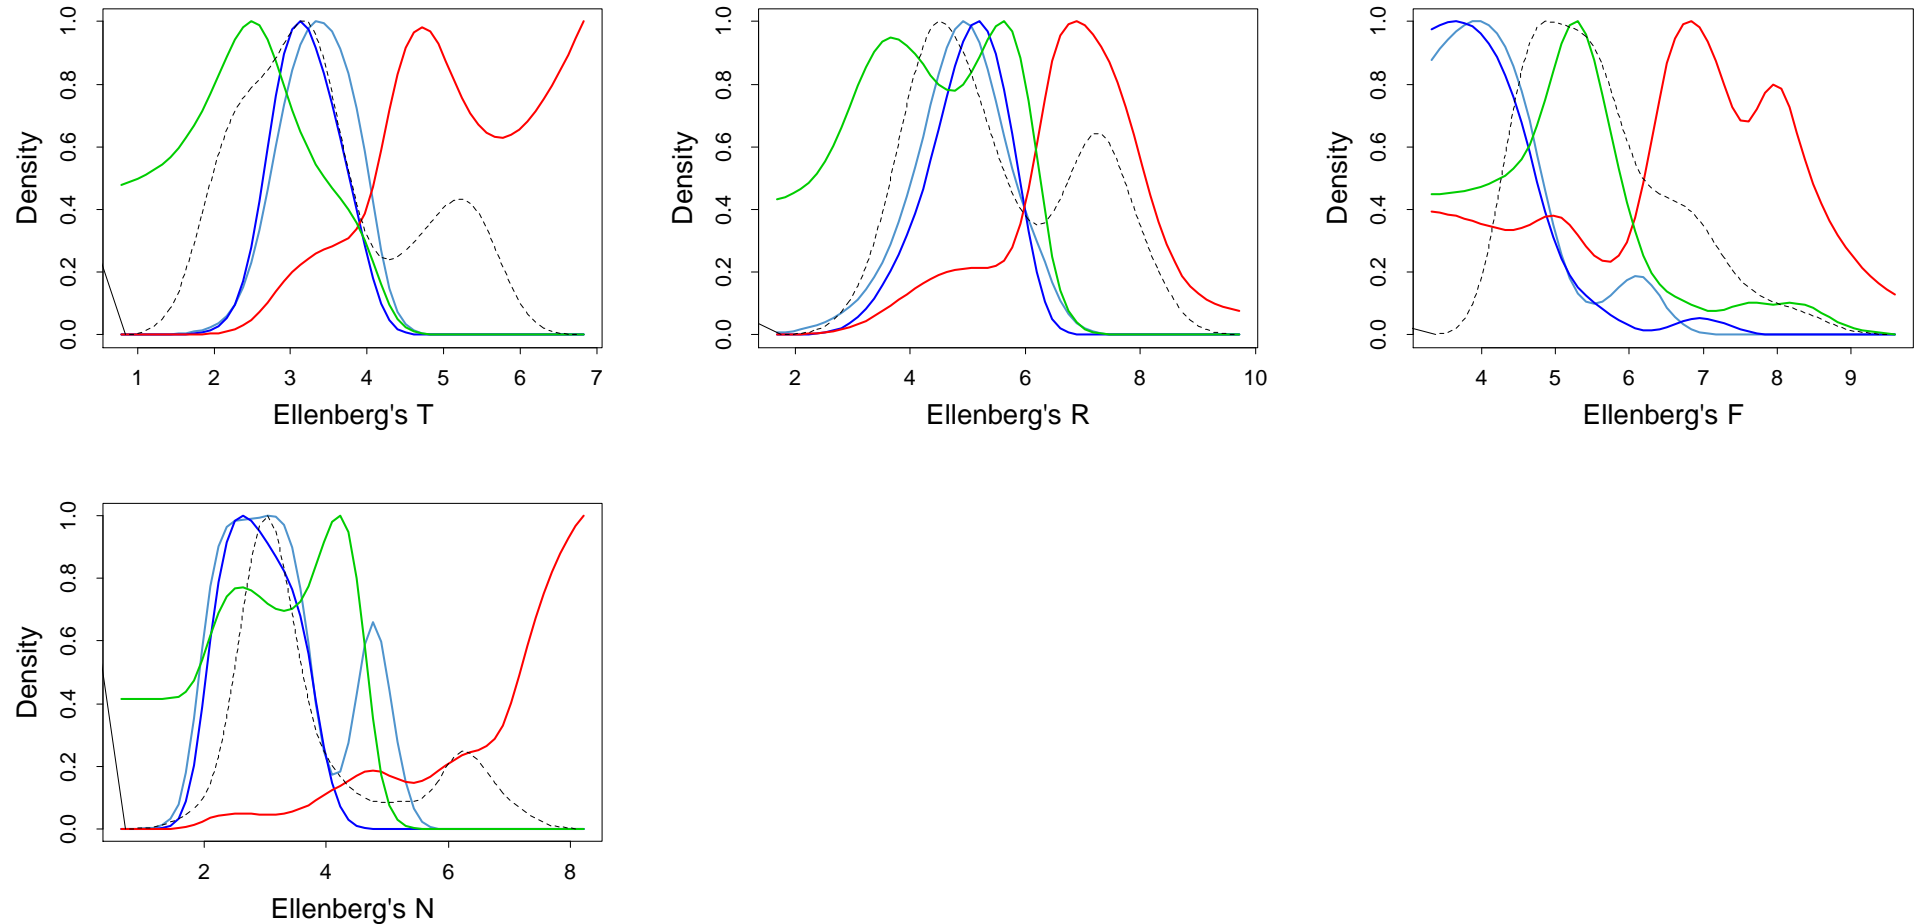

Supplement: hdy201614x1.pdf [file hdy201614x1.pdf]
